# Supplementary material for: Nearest labelset using double distances for multi-label classification
Source: PeerJ Comput Sci. 2019 Dec 9;5:e242. doi: 10.7717/peerj-cs.242 (PMC7924696; doi:10.7717/peerj-cs.242)
Supplement: Table S4 — compares NLDD with two other approaches that rely on only one of the distances: nearest neighbor (NN) using Dx only and SMBR using Dy only. [file peerj-cs-05-242-s006.csv]

Data	NN	SMBR	NLDD
emotions	0.621	0.629	0.645
scene	0.688	0.643	0.736
yeast	0.583	0.616	0.644
medical	0.642	0.796	0.827
slashdot	0.302	0.516	0.562
enron	0.425	0.530	0.520
ohsumed	0.162	0.455	0.488
tmc2007	0.527	0.670	0.662
bibtex	0.239	0.393	0.411
